# Supplementary material for: Thiamine antagonists trigger p53-dependent apoptosis in differentiated SH-SY5Y cells
Source: PubMed Central journal article supplement (PMC5587765; doi:10.1038/s41598-017-10878-x), 2017-09-06
Supplement: 41598_2017_10878_MOESM1_ESM.pdf [file 41598_2017_10878_MOESM1_ESM.pdf]

## **Thiamine antagonists trigger p53-dependent apoptosis in differentiated SH-SY5Y cells**

Sergiy Chornyy<sup>1</sup>, Yulia Parkhomenko<sup>2</sup> and Nataliya Chorna<sup>3,4</sup>

<sup>1</sup>Department of Psychology, University of Haifa, Haifa, IL

<sup>2</sup> Department of Vitamin and Coenzyme Biochemistry, Palladine Institute of Biochemistry, Kyiv, UA

<sup>3</sup>Department of Biochemistry, University of Puerto Rico, School of Medicine, San Juan, PR, USA

<sup>4</sup>PR-INBRE Metabolomics Research Core, University of Puerto Rico, School of Medicine, San Juan, PR, USA

Correspondence should be addressed to Dr. Nataliya Chorna, Department of Biochemistry, University of Puerto Rico, School of Medicine, A632 Main Building, San Juan PR 00935; e-mail: nataliya.chorna@upr.edu, Ph: 787-758-2525 ext. 1640

**Supplementary Table S1** Metabolites content in neuronally differentiated SH-SY5Y after exposure to 1000  $\mu$ M OT for 72 h.

| N  | HMDB ID <sup>a</sup> | NAME                     | RT (min) <sup>b</sup> | FOLD CHANGE <sup>c</sup> | CONTENT | CHARACTERISTIC FRAGMENT IONS |
|----|----------------------|--------------------------|-----------------------|--------------------------|---------|------------------------------|
| 1  | HMDB00190            | L-lactic acid            | 9.89                  | 1.24                     | up      | 73,147,261                   |
| 2  | HMDB00042            | Acetic acid              | 10.5                  | 1.11                     |         | 73,147,189                   |
| 3  | HMDB00161            | L-alanine                | 10.99                 | -2.02                    | down    | 73,158,232                   |
| 4  | HMDB00123            | Glycine                  | 11.31                 | -1.70                    | down    | 73,147,218                   |
| 5  | HMDB00883            | L-valine                 | 12.73                 | 1.01                     |         | 73,186,260                   |
| 6  | HMDB00687            | L-leucine                | 13.3                  | 1.08                     |         | 73, 200, 274                 |
| 7  | HMDB00172            | L-isoleucine             | 13.74                 | 1.06                     |         | 73, 200, 274                 |
| 8  | HMDB00254            | Succinic acid            | 14.1                  | -1.13                    | down    | 73,147,289                   |
| 9  | HMDB00162            | L-proline                | 14.25                 | -2.90                    | down    | 73,184,258                   |
| 10 | HMDB00134            | Fumaric acid             | 14.4                  | -1.87                    | down    | 73,287                       |
| 11 | HMDB00267            | 5-Oxoproline             | 16.21                 | -1.39                    | down    | 73,272,300                   |
| 12 | HMDB00167            | L-threonine              | 17.09                 | -2.02                    | down    | 73,303                       |
| 13 | HMDB00806            | Myristic acid            | 17.77                 | 1.70                     | up      | 75,285                       |
| 14 | HMDB00159            | L-phenylalanine          | 17.89                 | -1.61                    | down    | 73,234,302                   |
| 15 | HMDB00812            | N-acetyl-L-aspartic acid | 18                    | -1.29                    | down    | 73,346                       |
| 16 | HMDB00156            | Malic acid               | 18.12                 | -1.82                    | down    | 73,115,419                   |
| 17 | HMDB00191            | L-aspartic acid          | 19.03                 | -1.38                    | down    | 73,302,418                   |
| 18 | HMDB03229            | Palmitoleic acid         | 20.24                 | 1.36                     | up      | 75,129,311                   |
| 19 | HMDB00148            | L-glutamic acid          | 20.32                 | -1.54                    | down    | 73,272,432                   |
| 20 | HMDB00220            | Palmitic acid            | 20.43                 | 1.35                     | up      | 75,129,313                   |
| 21 | HMDB00207            | Oleic acid               | 22.34                 | 1.36                     | up      | 75,129,339                   |
| 22 | HMDB00827            | Stearic acid             | 22.5                  | 1.27                     | up      | 75,129,341                   |
| 23 | HMDB00094            | Citric acid              | 23.84                 | 1.17                     |         | 73,459,591                   |
| 24 | HMDB00158            | L-tyrosine               | 24.04                 | -1.08                    | down    | 73,302                       |
| 25 | HMDB01874            | Isocitric acid           | 24.59                 | 1.32                     | up      | 73,345                       |
| 26 | HMDB00067            | Cholesterol              | 37.2                  | -1.30                    | down    | 75,443                       |

<sup>a</sup> Human Metabolome Database (HMDB) compound IDs

<sup>b</sup> Retention time

<sup>c</sup> Metabolite fold changes were computed by Ingenuity Pathway Analysis (Qiagen) from experimental ratio values calculated using average peak intensity of each metabolite (OT vs non-treated control cells) obtained from the GCMS Solution Postrun Analysis software (Shimadzu Corp).

**Supplementary Table S2** Genes differentially regulated in neuronally differentiated SH-SY5Y cells after exposure to 1000  $\mu$ M OT for 72 h

| <b>N</b> | <b>GENBANK</b> | <b>SYMBOL</b> | <b>DESCRIPTION</b>                                     | <b>Average<sup>a</sup><br/>Ratio<br/>OT/(-)</b> | <b>EXPRESSION</b> | <b>P value<sup>b</sup></b> |
|----------|----------------|---------------|--------------------------------------------------------|-------------------------------------------------|-------------------|----------------------------|
| 1        | X56932         | RPL13A        | Ribosomal protein L13a (Houskeeping gene)              | 1.03                                            |                   |                            |
| 2        | NP_002039.2    | GAS1          | Growth arrest specific 1 protein                       | 1.76                                            | up                | $P < 0.01$                 |
| 3        | U60520         | CASP8         | Caspase 8, apoptosis-related cysteine peptidase        | 0.69                                            | down              | $P < 0.05$                 |
| 4        | U56390         | CASP9         | Caspase 9, apoptosis-related cysteine peptidase        | 1.85                                            | up                | $P < 0.01$                 |
| 5        | U60519         | CASP10        | Caspase 10, apoptosis-related cysteine peptidase       | 1.06                                            |                   |                            |
| 6        | U21092         | TRAF3         | CD40 receptor-associated factor 1 (CRAF1)              | 1.40                                            |                   |                            |
| 7        | NP_001243092.1 | BIRC2         | Baculoviral IAP repeat containing 2                    | 0.63                                            | down              | $P < 0.01$                 |
| 8        | D38122         | FASLG         | Fas ligand (TNF superfamily, member 6)                 | 0.43                                            | down              | $P < 0.05$                 |
| 9        | AF017986       | SFRP2         | Secreted frizzled-related protein 2                    | 0.81                                            | down              | $P < 0.05$                 |
| 10       | AF017988       | SFRP5         | Secreted frizzled-related protein 5                    | 2.25                                            | up                | $P < 0.01$                 |
| 11       | M33294         | TNFRSF1A      | Tumor necrosis factor receptor superfamily, member 1A  | 0.55                                            | down              | $P < 0.01$                 |
| 12       | M32315         | TNFRSF1B      | Tumor necrosis factor receptor superfamily, member 1B  | 0.68                                            | down              | $P < 0.05$                 |
| 13       | AF016268       | TNFRSF10B     | Tumor necrosis factor receptor superfamily, member 10b | 0.73                                            | down              | $P < 0.01$                 |
| 14       | Y09392         | TNFRSF25      | Tumor necrosis factor receptor superfamily, member 25  | 0.85                                            |                   | $P < 0.05$                 |
| 15       | M27544         | IGF1          | Insulin-like growth factor 1 (somatomedin C)           | 1.02                                            |                   |                            |
| 16       | M35410         | IGFBP2        | Insulin-like growth factor binding protein 2, 36kDa    | 1.24                                            |                   |                            |
| 17       | M31159         | IGFBP3        | Insulin-like growth factor binding protein 3           | 0.77                                            |                   |                            |

|    |                |         |                                                               |      |      |             |
|----|----------------|---------|---------------------------------------------------------------|------|------|-------------|
| 18 | M62402         | IGFBP6  | Insulin-like growth factor binding protein 6                  | 0.94 |      |             |
| 19 | X76104         | DAPK1   | Death-associated protein kinase 1                             | 2.32 | up   | $P < 0.001$ |
| 20 | X86779         | FASTK   | Fas-activated serine/threonine kinase                         | 0.37 | down | $P < 0.05$  |
| 21 | U91985         | DFFA    | DNA fragmentation factor 45 (DFF45)                           | 2.10 | up   | $P < 0.01$  |
| 22 | AF022385       | PDCD10  | Apoptosis-related protein TFAR15                              | 2.63 | up   | $P < 0.05$  |
| 23 | NP_001655.1    | RHOA    | Ras homolog family member A                                   | 3.08 | up   | $P < 0.01$  |
| 24 | D13889         | ID1     | DNA-binding protein inhibitor ID-1; Id-1H                     | 3.23 | up   | $P < 0.05$  |
| 25 | NP_001181982.1 | DDIT3   | DNA-damage-inducible transcript 3 (DDIT3)                     | 2.49 | up   | $P < 0.001$ |
| 26 | M60974         | GADD45A | Growth arrest and DNA-damage-inducible, alpha                 | 1.83 | up   | $P < 0.05$  |
| 27 | M84820         | RXRB    | Retinoid X receptor, beta                                     | 1.04 |      |             |
| 28 | X07282         | RARB    | Retinoic acid receptor, beta                                  | 1.05 |      |             |
| 29 | L20320         | CDK7    | Cyclin-dependent kinase 7                                     | 1.07 |      |             |
| 30 | NP_004926.1    | CDK5    | Cyclin-dependent-like kinase 5 isoform 1                      | 1.04 |      |             |
| 31 | L29220         | CLK3    | CDC-like kinase 3 (CLK3)                                      | 1.03 |      |             |
| 32 | X66362         | CDK18   | Cyclin-dependent kinase 18                                    | 1.49 |      |             |
| 33 | L22005         | CDC34   | Cell division cycle 34                                        | 0.65 |      |             |
| 34 | NP_620407.1    | MAPK1   | Mitogen-activated protein kinase 1                            | 0.79 |      |             |
| 35 | U25278         | MAPK7   | Mitogen-activated protein kinase 7                            | 1.26 |      |             |
| 36 | Y10479         | E2F3    | Transcription factor E2F3                                     | 0.54 | down | $P < 0.05$  |
| 37 | U15642         | E2F5    | Transcription factor E2F5                                     | 0.37 | down | $P < 0.05$  |
| 38 | U18422         | TFDP2   | Transcription factor DP2 (Humdp2); E2F dimerization partner 2 | 1.23 |      |             |
| 39 | M36981         | NME2    | NME/NM23 nucleoside diphosphate kinase 2                      | 0.80 | down | $P < 0.05$  |
| 40 | AF010311       | PRODH   | proline dehydrogenase 1                                       | 2.42 | up   | $P < 0.05$  |

<sup>a</sup> Analysis and quantification was conducted using the AtlasImage 2.0 software (BD Biosciences Clontech) and global normalization method (sum method) as said in Material and methods section. The gene expression responses were calculated as ratios between adjusted intensities obtained for OT and control non-treated (-) cells.

<sup>b</sup> The *P* values were assessed using ratios calculated for the individual genes compare to housekeeping gene (60S ribosomal protein (L13A)) using Student's *t*-test. Statistical significance was assumed at \**P* <0.05, \*\**P* <0.01 or \*\*\**P* <0.001
